# Supplementary material for: Implication of the Mosquito Midgut Microbiota in the Defense against Malaria Parasites
Source: PLoS Pathog. 2009 May 8;5(5):e1000423. doi: 10.1371/journal.ppat.1000423 (PMC2673032; doi:10.1371/journal.ppat.1000423)
Supplement: Table S2 — List of genes identified from microarray analysis exhibiting significant differential expression between untreated septic and antibiotic-treated aseptic adult female A. gambiae Keele mosquitoes fed with sugar (7-day-old whole mosquitoes minus head). (0.06 MB XLS) [file ppat.1000423.s005.xls]

## Sheet: Qry__SF_fed_with_master_functio
Ensembl Transcript ID	New VectorBase AGAP- ID	Name	Putative Functions	GO ID	GO Description	Functional Goup	SF-log2-Mean
ENSANGT00000001203	AGAP004860-RA	AMINOPEPTIDASE N EC3.4.11.2 MICROSOMAL AMINOPEPTIDASE	AMINOPEPTIDASE N EC3.4.11.2 MICROSOMAL AMINOPEPTIDASE	GO:0006508;GO:0004179	proteolysis;membrane alanyl aminopeptidase activity	PROT	0.774611
ENSANGT00000001833	AGAP012515-RA	ATP SYNTHASE F CHAIN MITOCHONDRIAL EC_3.6.3.14	ATP SYNTHASE F CHAIN MITOCHONDRIAL EC3.6.3.14	GO:0005515	protein binding	REDOX/STRESS/MIT	0.988783
ENSANGT00000002169		UNKNOWN	ENSANGT00000002169			U	0.780055
ENSANGT00000002653	AGAP006686-RA	ALPHA ACTININ ALPHA ACTININ F ACTIN CROSS LINKING	ALPHA ACTININ ALPHA ACTININ F ACTIN CROSS LINKING	GO:0005509;GO:0005515;GO:0030707;GO:0005938;GO:0030727;GO:0005886;GO:0007274;GO:0008017;GO:0045169;GO:0007294;GO:0005794;GO:0048134;GO:0007009;GO:0007308;GO:0030721;GO:0045170;GO:0045478	calcium ion binding;protein binding;ovarian follicle cell development (sensu Insecta);cell cortex;female germ-line cyst formation (sensu Insecta);plasma membrane;neuromuscular synaptic transmission;microtubule binding;fusome;oocyte fate determination (sen	CS	0.687001
ENSANGT00000002729	AGAP003926-RA	AMINOPEPTIDASE N EC3.4.11.2 MICROSOMAL AMINOPEPTIDASE	AMINOPEPTIDASE N EC3.4.11.2 MICROSOMAL AMINOPEPTIDASE	GO:0006508;GO:0004179	proteolysis;membrane alanyl aminopeptidase activity	PROT	0.678017
ENSANGT00000003527		CYTOCHROME P450	CYTOCHROME P450			REDOX/STRESS/MIT	-0.738392
ENSANGT00000003535		ENSANGT00000003535	CYTOCHROME P450			REDOX/STRESS/MIT	-0.780715
ENSANGT00000004272	AGAP006416-RB	PRECURSOR				PTOT	0.899664
ENSANGT00000005393	AGAP001010-RA	CHONDROITIN SYNTHASE	CHONDROITIN SYNTHASE			D	0.710716
ENSANGT00000007563	AGAP007128-RA	RIBOSOME BIOGENESIS BOP1 BLOCK OF PROLIFERATION 1	RIBOSOME BIOGENESIS BOP1 BLOCK OF PROLIFERATION 1	GO:0007046;GO:0006364;GO:0005515	ribosome biogenesis;rRNA processing;protein binding	RTT	-0.76221
ENSANGT00000008288	AGAP011226-RA	FBNENSANGE00000028476ENSANGG00000006254ENSANGT00000008288	FBN			I(FBN)	-1.00003
ENSANGT00000008530	AGAP001690-RA	UNKNOWN	ENSANGT00000008530			U	-1.03826
ENSANGT00000008952	AGAP012400-RA	MALTASE PRECURSOR	MALTASE PRECURSOR EC3.2.1.20	GO:0005975;GO:0004556	carbohydrate metabolism;alpha-amylase activity	D	0.858221
ENSANGT00000009474	AGAP007389-RA	ZINC FINGER	ZINC FINGER	GO:0003676;GO:0005634;GO:0008270	nucleic acid binding;nucleus;zinc ion binding	D	-0.761272
ENSANGT00000009736	AGAP001365-RA	SERINE PROTEASE GD PRECURSOR SP GD-LIKE1	SERINE PROTEASE GD PRECURSOR EC3.4.21.- GASTRULATION DEFECTIVE	GO:0004252;GO:0006508	serine-type endopeptidase activity;proteolysis	PROT	-0.72103
ENSANGT00000010051	AGAP005131-RA	40S RIBOSOMAL S24	40S RIBOSOMAL S24	GO:0005622;GO:0003735;GO:0006412;GO:0005840	intracellular;structural constituent of ribosome;protein biosynthesis;ribosome	RTT	-1.03806
ENSANGT00000010070		ATP DEPENDENT HELICASE	ATP DEPENDENT HELICASE			RTT	-1.07489
ENSANGT00000010360	AGAP009623-RA	GLYCERALDEHYDE 3 PHOSPHATE DEHYDROGENASE	GLYCERALDEHYDE 3 PHOSPHATE DEHYDROGENASE EC1.2.1.12 GAPDH	GO:0008943;GO:0004365;GO:0016491;GO:0051287;GO:0006096;GO:0006006	glyceraldehyde-3-phosphate dehydrogenase activity;glyceraldehyde-3-phosphate dehydrogenase (phosphorylating) activity;oxidoreductase activity;NAD binding;glycolysis;glucose metabolism	D	1.05265
ENSANGT00000010800	AGAP004802-RA	4 HYDROXYPHENYLPYRUVATE DIOXYGENASE EC1.13.11.27 4HPPD HPD HPPDASE	4 HYDROXYPHENYLPYRUVATE DIOXYGENASE EC1.13.11.27 4HPPD HPD HPPDASE	GO:0003868;GO:0009072;GO:0005515	4-hydroxyphenylpyruvate dioxygenase activity;aromatic amino acid family metabolism;protein binding	M	0.810869
ENSANGT00000010957	AGAP004038-RA	PEROXIDASE PRECURSOR	PEROXIDASE PRECURSOR			REDOX/STRESS/MIT	0.762316
ENSANGT00000010980	AGAP006593-RA	DUAL SPECIFICITY PHOSPHATASE EC_3.1.3.48 EC_3.1.3.- 16 MITOGEN ACTIVATED KINASE PHOSPHATASE MAP KINASE PHOSPHATASE MKP	DUAL SPECIFICITY PHOSPHATASE EC3.1.3.48 EC3.1.3.- 16 MITOGEN ACTIVATED KINASE PHOSPHATASE MAP KINASE PHOSPHATASE MKP	GO:0004721;GO:0016787;GO:0008138;GO:0006470	phosphoprotein phosphatase activity;hydrolase activity;protein tyrosine/serine/threonine phosphatase activity;protein amino acid dephosphorylation	D	-0.787791
ENSANGT00000011016	AGAP007593-RB	GLYCEROL 3 PHOSPHATE DEHYDROGENASE [NAD+] CYTOPLASMIC EC1.1.1.8 GPD C GPDH C	GLYCEROL 3 PHOSPHATE DEHYDROGENASE [NAD+] CYTOPLASMIC EC1.1.1.8 GPD C GPDH C	GO:0006072;GO:0009331;GO:0016614;GO:0005975;GO:0004367;GO:0046168;GO:0051287;GO:0016616;GO:0005737	glycerol-3-phosphate metabolism;glycerol-3-phosphate dehydrogenase complex;oxidoreductase activity, acting on CH-OH group of donors;carbohydrate metabolism;glycerol-3-phosphate dehydrogenase (NAD+) activity;glycerol-3-phosphate catabolism;NAD binding;oxid	M	-0.804801
ENSANGT00000011028	AGAP003556-RA	60S RIBOSOMAL L3	60S RIBOSOMAL L3	GO:0005622;GO:0003735;GO:0030529;GO:0006412;GO:0005840;GO:0005515	intracellular;structural constituent of ribosome;ribonucleoprotein complex;protein biosynthesis;ribosome;protein binding	RTT	0.944036
ENSANGT00000011122	AGAP008724-RA	"CYTOCHROME C OXIDASE, SUBUNIT VB"	COX5B	GO:0006118;GO:0005740;GO:0004129	electron transport;mitochondrial envelope;cytochrome-c oxidase activity	REDOX/STRESS/MIT	0.712171
ENSANGT00000011142		UNKNOWN	ENSANGT00000011142			U	1.07416
ENSANGT00000011227		UNKNOWN	ENSANGT00000011227			U	0.872494
ENSANGT00000011252		FBNENSANGE00000039257ENSANGG00000008763ENSANGT00000011252	FBN			I(FBN)	0.860531
ENSANGT00000011263	AGAP007119-RA	SIDEROFLEXIN	SIDEROFLEXIN	GO:0016020;GO:0006812;GO:0008324	membrane;cation transport;cation transporter activity	TRP	-0.972409
ENSANGT00000011363	AGAP011396-RA	"Calponin-like,EF-hand,GAS2,M_repeat,Plectin_repeat,Spectrin"	Calponin-like,EF-hand,GAS2,Mrepeat,Plectinrepeat,Spectrin	GO:0005509;GO:0007050;GO:0003779;GO:0005874;GO:0007475;GO:0016203;GO:0007010;GO:0007424;GO:0008017;GO:0007423;GO:0016319;GO:0016358;GO:0005856;GO:0007409;GO:0000226;GO:0045169;GO:0007017;GO:0005912;GO:0007026;GO:0016204;GO:0030516;GO:0030716;GO:0035147;GO	calcium ion binding;cell cycle arrest;actin binding;microtubule;apposition of dorsal and ventral wing surfaces;muscle attachment;cytoskeleton organization and biogenesis;tracheal system development (sensu Insecta);microtubule binding;sensory organ develop	D	0.986547
ENSANGT00000011452	AGAP004963-RA	G2/MITOTIC SPECIFIC CYCLIN B	G2/MITOTIC SPECIFIC CYCLIN B	GO:0005634;GO:0000074	nucleus;regulation of progression through cell cycle	D	0.698013
ENSANGT00000011466	AGAP007575-RA	AMBIGUOUS	ENSANGT00000011466	GO:0005515	protein binding	U	0.917544
ENSANGT00000011566	AGAP006613-RB	EUKARYOTIC TRANSLATION INITIATION FACTOR 3 SUBUNIT 1 EIF 3 ALPHA EIF3 P35 EIF3J	EUKARYOTIC TRANSLATION INITIATION FACTOR 3 SUBUNIT 1 EIF 3 ALPHA EIF3 P35 EIF3J			RTT	0.979615
ENSANGT00000011666		DISULFIDE ISOMERASE PRECURSOR EC_5.3.4.1				D	0.822432
ENSANGT00000011670		GLYOXYLATE REDUCTASE/HYDROXYPYRUVATE REDUCTASE EC_1.1.1.79	GLYOXYLATE REDUCTASE/HYDROXYPYRUVATE REDUCTASE EC1.1.1.79	GO:0016491;GO:0016616;GO:0006564	oxidoreductase activity;oxidoreductase activity, acting on the CH-OH group of donors, NAD or NADP as acceptor;L-serine biosynthesis	M	0.821179
ENSANGT00000011965	AGAP009985-RA	UNKNOWN	ENSANGT00000011965	GO:0008152;GO:0016787	metabolism;hydrolase activity	M	0.722559
ENSANGT00000011995	AGAP000694-RA	UNKNOWN	Cecropin	GO:0042742;GO:0006961;GO:0045087;GO:0005576;GO:0006955	defense response to bacteria;antibacterial humoral response (sensu Protostomia);innate immune response;extracellular region;immune response	I	0.864223
ENSANGT00000012208	AGAP004556-RA	SUPPRESSOR OF SWI4 1 HOMOLOG SSF 1 PETER PAN HOMOLOG	SUPPRESSOR OF SWI4 1 HOMOLOG SSF 1 PETER PAN HOMOLOG	GO:0005554;GO:0007444;GO:0008372;GO:0002164;GO:0007292	molecular function unknown;imaginal disc development;cellular component unknown;larval development;female gamete generation	D	0.705961
ENSANGT00000012412	AGAP000252-RA	AMBIGUOUS	PeptidaseM3			PROT	0.81658
ENSANGT00000012468	AGAP012657-RA	ENSANGT00000012468	ENSANGT00000012468	GO:0008152	metabolism	M	0.700184
ENSANGT00000012555		MYOSIN HEAVY CHAIN				U	0.755978
ENSANGT00000012575	AGAP000249-RA	AMBIGUOUS	ENSANGT00000012575	GO:0005515	protein binding	U	-0.758158
ENSANGT00000012705	AGAP004851-RA	AMBIGUOUS	ChitinbindPerA	GO:0005576;GO:0008061;GO:0006030	extracellular region;chitin binding;chitin metabolism	CS	1.8172
ENSANGT00000012884		INTERLEUKIN 16 PRECURSOR IL 16 LYMPHOCYTE CHEMOATTRACTANT FACTOR LCF	INTERLEUKIN 16 PRECURSOR IL 16 LYMPHOCYTE CHEMOATTRACTANT FACTOR LCF			D	-0.751764
ENSANGT00000012914	AGAP004218-RA	AMBIGUOUS	Ig-like			D	0.679476
ENSANGT00000012979	AGAP006342-RA	PEPTIDOGLYCAN RECOGNITION	PEPTIDOGLYCAN RECOGNITION,Amidase2	GO:0005515;GO:0008745;GO:0009253	protein binding;N-acetylmuramoyl-L-alanine amidase activity;peptidoglycan catabolism	I	0.881014
ENSANGT00000013058	AGAP004382-RA	GLUTATHIONE S TRANSFERASE EC2.5.1.18 GST CLASS THETA	GLUTATHIONE S TRANSFERASE EC2.5.1.18 GST CLASS THETA	GO:0016740	transferase activity	REDOX/STRESS/MIT	0.695521
ENSANGT00000013205	AGAP004887-RA	40S RIBOSOMAL S17	40S RIBOSOMAL S17	GO:0005622;GO:0003735;GO:0006412;GO:0005840;GO:0030529	intracellular;structural constituent of ribosome;protein biosynthesis;ribosome;ribonucleoprotein complex	RTT	0.719398
ENSANGT00000013237	AGAP006795-RA	PERITROPHIN 1 PRECURSOR	PERITROPHIN 1 PRECURSOR	GO:0005576;GO:0008061;GO:0006030	extracellular region;chitin binding;chitin metabolism	CS	0.930356
ENSANGT00000013255	AGAP008645-RA	GAMBICIN	GAMBICIN			I	1.54211
ENSANGT00000013315	AGAP009928-RA	UNKNOWN	Antifreeze1,CytChemebind,OPRPB1,ZnfZZ	GO:0008270	zinc ion binding	U	0.698496
ENSANGT00000013323	AGAP001760-RA	CALCIUM BINDING P22 CALCIUM BINDING CHP CALCINEURIN HOMOLOGOUS	CALCIUM BINDING P22 CALCIUM BINDING CHP CALCINEURIN HOMOLOGOUS	GO:0005509	calcium ion binding	D	0.729833
ENSANGT00000013446	AGAP004263-RA	CIRCADIAN CLOCK CONTROLLED PRECURSOR	CIRCADIAN CLOCK CONTROLLED PRECURSOR	GO:0005554	molecular function unknown	U	1.03632
ENSANGT00000013781	AGAP006278-RA	UNKNOWN	D7 PRECURSOR ALLERGEN AED A 2	GO:0005549;GO:0006810	odorant binding;transport	TRP	0.806958
ENSANGT00000013813		UNKNOWN	ENSANGT00000013813			U	-0.719448
ENSANGT00000013948	AGAP001212-RA	PGRPLB	PEPTIDOGLYCAN RECOGNITION,Amidase2	GO:0005515;GO:0008745;GO:0009253;GO:0005576;GO:0050830;GO:0000270;GO:0042834;GO:0004040	protein binding;N-acetylmuramoyl-L-alanine amidase activity;peptidoglycan catabolism;extracellular region;defense response to Gram-positive bacteria;peptidoglycan metabolism;peptidoglycan binding;amidase activity	I	1.69007
ENSANGT00000013987		CELLULAR RETINALDEHYDE BINDING CRALBP	CELLULAR RETINALDEHYDE BINDING CRALBP			TRP	0.954343
ENSANGT00000014100	AGAP012188-RA	UBIQUINOL CYTOCHROME C REDUCTASE COMPLEX 14 KDA EC1.10.2.2 COMPLEX III SUBUNIT VI	UBIQUINOL CYTOCHROME C REDUCTASE COMPLEX 14 KDA EC1.10.2.2 COMPLEX III SUBUNIT VI	GO:0008121;GO:0006122;GO:0006118	ubiquinol-cytochrome-c reductase activity;mitochondrial electron transport, ubiquinol to cytochrome c;electron transport	D	0.768038
ENSANGT00000014166	AGAP005432-RA	PROGRAMMED CELL DEATH 5 TFAR19	PROGRAMMED CELL DEATH 5 TFAR19 TF 1 CELL APOPTOSIS RELATED GENE 19	GO:0005515	protein binding	D	-0.732629
ENSANGT00000014378		GLYCINE DEHYDROGENASE [DECARBOXYLATING] MITOCHONDRIAL PRECURSOR	GLYCINE DEHYDROGENASE [DECARBOXYLATING] MITOCHONDRIAL PRECURSOR EC1.4.4.2 GLYCINE DECARBOXYLASE GLYCINE CLEAVAGE SYSTEM P			M	0.804586
ENSANGT00000014416	AGAP012745-RA	AMINOPEPTIDASE N EC_3.4.11.2 MICROSOMAL AMINOPEPTIDASE	Peptidase M, neutral zinc metallopeptidases, zinc-binding site;Peptidase M1, membrane alanine aminopeptidase;Ribosomal protein L31			PROT	1.28665
ENSANGT00000014711	AGAP003203-RA	VACUOLAR SORTING	VACUOLAR SORTING	GO:0006904;GO:0016192;GO:0005515;GO:0006727;GO:0046907;GO:0008333;GO:0008057;GO:0005764;GO:0006622;GO:0007032	vesicle docking during exocytosis;vesicle-mediated transport;protein binding;ommochrome biosynthesis;intracellular transport;endosome to lysosome transport;eye pigment granule organization and biogenesis;lysosome;protein targeting to lysosome;endosome org	D	-0.735874
ENSANGT00000014774		GROWTH HORMONE INDUCIBLE TRANSMEMBRANE DERMAL PAPILLA DERIVED 2 MY021 PTD010 UNQ244/PRO281				U	0.933852
ENSANGT00000014782	AGAP009850-RA	ATP BINDING CASSETTE SUB FAMILY G MEMBER	ATP BINDING CASSETTE SUB FAMILY G MEMBER	GO:0000166;GO:0016887;GO:0017111;GO:0005524;GO:0005515	nucleotide binding;ATPase activity;nucleoside-triphosphatase activity;ATP binding;protein binding	TRP	-1.25048
ENSANGT00000014914	AGAP002355-RA	GLUTAMINE SYNTHETASE EC_6.3.1.2 GLUTAMATE AMMONIA LIGASE	GLUTAMINE SYNTHETASE EC6.3.1.2 GLUTAMATE AMMONIA LIGASE	GO:0004356;GO:0006542;GO:0006807	glutamate-ammonia ligase activity;glutamine biosynthesis;nitrogen compound metabolism	M	-1.09452
ENSANGT00000014919	AGAP002359-RA	CARBONIC ANHYDRASE EC_4.2.1.1 CARBONATE DEHYDRATASE CA	CARBONIC ANHYDRASE EC4.2.1.1 CARBONATE DEHYDRATASE CA	GO:0004089;GO:0006730;GO:0008270	carbonate dehydratase activity;one-carbon compound metabolism;zinc ion binding	M	0.789718
ENSANGT00000014931		ENSANGT00000014931				U	0.709111
ENSANGT00000014946	AGAP011505-RA	UNKNOWN	ENSANGT00000014946			U	-0.723393
ENSANGT00000014976	AGAP002409-RA	TRNA PSEUDOURIDINE SYNTHASE A EC4.2.1.70 PSEUDOURIDYLATE SYNTHASE I PSEUDOURIDINE SYNTHASE I URACIL HYDROLYASE	TRNA PSEUDOURIDINE SYNTHASE A EC4.2.1.70 PSEUDOURIDYLATE SYNTHASE I PSEUDOURIDINE SYNTHASE I URACIL HYDROLYASE	GO:0004730;GO:0008033;GO:0005515	pseudouridylate synthase activity;tRNA processing;protein binding	D	-0.730872
ENSANGT00000015193		UNKNOWN	ENSANGT00000015193			U	-0.846526
ENSANGT00000015238	AGAP009324-RA	60S RIBOSOMAL L34	60S RIBOSOMAL L34	GO:0005622;GO:0003735;GO:0006412;GO:0005840	intracellular;structural constituent of ribosome;protein biosynthesis;ribosome	RTT	-1.12953
ENSANGT00000015254	AGAP008212-RA AGAP008209-RA	CYTOCHROME P450	CYTOCHROME P450			REDOX/STRESS/MIT	0.914944
ENSANGT00000015396	AGAP011548-RA	ZINC FINGER	ZINC FINGER	GO:0003676;GO:0005634;GO:0008270;GO:0005515	nucleic acid binding;nucleus;zinc ion binding;protein binding	D	-0.757346
ENSANGT00000015577	AGAP000327-RA	TYROSINE AMINOTRANSFERASE	TYROSINE AMINOTRANSFERASE EC2.6.1.5 L TYROSINE:2 OXOGLUTARATE AMINOTRANSFERASE TAT	GO:0016769;GO:0009058;GO:0005515	transferase activity, transferring nitrogenous groups;biosynthesis;protein binding	D	0.816125
ENSANGT00000015585	AGAP000325-RA	LYSYL TRNA SYNTHETASE EC_6.1.1.6 LYSINE TRNA LIGASE LYSRS	LYSYL TRNA SYNTHETASE EC6.1.1.6 LYSINE TRNA LIGASE LYSRS	GO:0000166;GO:0016779;GO:0003676;GO:0004812;GO:0006418;GO:0004824;GO:0006430;GO:0016740;GO:0005737;GO:0003887;GO:0006260;GO:0006412;GO:0016874;GO:0005524	nucleotide binding;nucleotidyltransferase activity;nucleic acid binding;aminoacyl-tRNA ligase activity;tRNA aminoacylation for protein translation;lysine-tRNA ligase activity;lysyl-tRNA aminoacylation;transferase activity;cytoplasm;DNA-directed DNA polyme	M	0.698192
ENSANGT00000015621	AGAP011294-RA	DEFENSIN PRECURSOR	DEFENSIN	GO:0042742;GO:0006952;GO:0045087;GO:0006955;GO:0006961;GO:0050830	defense response to bacteria;defense response;innate immune response;immune response;antibacterial humoral response (sensu Protostomia);defense response to Gram-positive bacteria	I	0.770878
ENSANGT00000015687	AGAP005149-RA	Nop10p	Nop10p	GO:0005515	protein binding	U	0.70512
ENSANGT00000015791	AGAP009824-RA	ENSANGT00000015791	ENSANGT00000015791	GO:0005515	protein binding	REDOX/STRESS/MIT	-1.21767
ENSANGT00000015802	AGAP009828-RA	SERINE PROTEASE	SERINE PROTEASE	GO:0004252;GO:0006508	serine-type endopeptidase activity;proteolysis	PROT	0.679067
ENSANGT00000015806		"MULTICOPPER OXIDASE LIKE, COPPER BINDING"	ENSANGT00000015806			U	0.710447
ENSANGT00000015831	AGAP009808-RA	PROBABLE ATP DEPENDENT RNA HELICASE DEAD BOX	PROBABLE ATP DEPENDENT RNA HELICASE DEAD BOX	GO:0004386;GO:0003676;GO:0016787;GO:0008026;GO:0005524;GO:0005515	helicase activity;nucleic acid binding;hydrolase activity;ATP-dependent helicase activity;ATP binding;protein binding	RTT	-0.709514
ENSANGT00000015852	AGAP003778-RA	ENSANGT00000015852	ENSANGT00000015852			U	0.911452
ENSANGT00000015864		UNKNOWN	ENSANGT00000015864			U	-0.768453
ENSANGT00000015996	AGAP010387-RA	SERINE PYRUVATE AMINOTRANSFERASE EC2.6.1.51 SPT ALANINE GLYOXYLATE AMINOTRANSFERASE EC2.6.1.- 44 AGT	SERINE PYRUVATE AMINOTRANSFERASE EC2.6.1.51 SPT ALANINE GLYOXYLATE AMINOTRANSFERASE EC2.6.1.- 44 AGT	GO:0008483;GO:0008152	transaminase activity;metabolism	D	0.8964
ENSANGT00000016000	AGAP010351-RA	INSULIN DEGRADING ENZYME EC3.4.24.56 INSULYSIN INSULINASE INSULIN PROTEASE	INSULIN DEGRADING ENZYME EC3.4.24.56 INSULYSIN INSULINASE INSULIN PROTEASE	GO:0006508;GO:0004222	proteolysis;metalloendopeptidase activity	PROT	0.898375
ENSANGT00000016053		HOMEOBOX	HOMEOBOX	GO:0043565;GO:0045449;GO:0005634;GO:0003677;GO:0003700;GO:0006355	sequence-specific DNA binding;regulation of transcription;nucleus;DNA binding;transcription factor activity;regulation of transcription, DNA-dependent	RTT	-0.688024
ENSANGT00000016074	AGAP012529-RA	GALECTIN_ENSANGE00000055534ENSANGG00000013585ENSANGT00000016074	LECTIN	GO:0005529	sugar binding	I	0.69736
ENSANGT00000016107	AGAP004657-RA	MITOCHONDRIAL IMPORT INNER MEMBRANE TRANSLOCASE SUBUNIT TIM17	MITOCHONDRIAL IMPORT INNER MEMBRANE TRANSLOCASE SUBUNIT TIM17	GO:0008565;GO:0015031;GO:0005743	protein transporter activity;protein transport;mitochondrial inner membrane	REDOX/STRESS/MIT	0.910731
ENSANGT00000016126	AGAP010383-RA	OLIGOPEPTIDE TRANSPORTER PEPTIDE TRANSPORTER H+/PEPTIDE COTRANSPORTER	OLIGOPEPTIDE TRANSPORTER PEPTIDE TRANSPORTER H+/PEPTIDE COTRANSPORTER	GO:0005215;GO:0006857;GO:0016020	transporter activity;oligopeptide transport;membrane	TRP	0.90285
ENSANGT00000016158	AGAP010376-RA	SH3 DOMAIN GRB2 ENDOPHILIN	SH3 DOMAIN GRB2 ENDOPHILIN	GO:0005515;GO:0005737	protein binding;cytoplasm	TRP	-0.76603
ENSANGT00000016373	AGAP008244-RA	UNKNOWN				U	1.95731
ENSANGT00000016460	AGAP012000-RA	FBNENSANGE00000056642ENSANGG00000013971ENSANGT00000016460	Fibrinogen, alpha/beta/gamma chain, C-terminal globular			I(FBN)	-0.730618
ENSANGT00000016523		DNA POLYMERASE THETA EC2.7.7.7 DNA POLYMERASE ETA	DNA POLYMERASE THETA EC2.7.7.7 DNA POLYMERASE ETA			RTT	0.701748
ENSANGT00000016626	AGAP012235-RA	PREFOLDIN SUBUNIT 6	Prefoldin beta-like	GO:0051082;GO:0006457;GO:0005515	unfolded protein binding;protein folding;protein binding	D	-0.726191
ENSANGT00000016928	AGAP002852-RA	E1_DerP2_DerF2	E1DerP2DerF2	GO:0005515	protein binding	I	-0.73311
ENSANGT00000016975	AGAP002814-RA	NGFI A BINDING EGR 1 BINDING	NGFI A BINDING EGR 1 BINDING	GO:0005634;GO:0016564;GO:0016481	nucleus;transcriptional repressor activity;negative regulation of transcription	D	-0.799057
ENSANGT00000017069		AMBIGUOUS	NLSBP			U	0.753672
ENSANGT00000017116		C2	C2			U	0.742899
ENSANGT00000017151		UNKNOWN	ENSANGT00000017151			U	0.69461
ENSANGT00000017378	AGAP005856-RA	PM5 PRECURSOR	PM5 PRECURSOR	GO:0003824;GO:0006725;GO:0008199	catalytic activity;aromatic compound metabolism;ferric iron binding	U	0.718518
ENSANGT00000017699		MITOCHONDRIAL UBIQUINOL CYTOCHROME C REDUCTASE COMPLEX FRAGMENT	MITOCHONDRIAL UBIQUINOL CYTOCHROME C REDUCTASE COMPLEX FRAGMENT			REDOX/STRESS/MIT	0.723476
ENSANGT00000017860	AGAP007340-RA	SOLUTE CARRIER FAMILY 2 FACILITATED GLUCOSE TRANSPORTER MEMBER GLUCOSE TRANSPORTER TYPE	SOLUTE CARRIER FAMILY 2 FACILITATED GLUCOSE TRANSPORTER MEMBER GLUCOSE TRANSPORTER TYPE			TRP	0.723099
ENSANGT00000017920	AGAP003879-RA	UNKNOWN	ENSANGT00000017920	GO:0016021;GO:0016469;GO:0046933;GO:0046961;GO:0015986;GO:0005515	integral to membrane;proton-transporting two-sector ATPase complex;hydrogen-transporting ATP synthase activity, rotational mechanism;hydrogen-transporting ATPase activity, rotational mechanism;ATP synthesis coupled proton transport;protein binding	TRP	-0.810149
ENSANGT00000017987	AGAP011706-RA	60S RIBOSOMAL L27A	60S RIBOSOMAL L27A	GO:0005622;GO:0003735;GO:0006412;GO:0005840	intracellular;structural constituent of ribosome;protein biosynthesis;ribosome	RTT	0.762454
ENSANGT00000018446	AGAP001976-RA	AMBIGUOUS	DUF101			U	0.757573
ENSANGT00000018496	AGAP001813-RA	HISTONE 3A	HISTONE H3	GO:0007001;GO:0005694;GO:0005634;GO:0003677;GO:0006334;GO:0000786;GO:0005515;GO:0007155;GO:0008360	chromosome organization and biogenesis (sensu Eukaryota);chromosome;nucleus;DNA binding;nucleosome assembly;nucleosome;protein binding;cell adhesion;regulation of cell shape	RTT	1.17857
ENSANGT00000018582	AGAP000967-RA	UNKNOWN	ENSANGT00000018582			U	-0.745108
ENSANGT00000018631	AGAP009431-RA	40S RIBOSOMAL S21	40S RIBOSOMAL S21	GO:0005622;GO:0003735;GO:0006412;GO:0005840;GO:0005515;GO:0008283;GO:0048542;GO:0043022	intracellular;structural constituent of ribosome;protein biosynthesis;ribosome;protein binding;cell proliferation;lymph gland development (sensu Arthropoda);ribosome binding	RTT	0.765695
ENSANGT00000018792	AGAP000966-RA	ACETYLCHOLINE RECEPTOR PROTEIN CHAIN PRECURSOR	ACETYLCHOLINE RECEPTOR PROTEIN CHAIN PRECURSOR	GO:0045211;GO:0005230;GO:0030594;GO:0006811;GO:0005216;GO:0016021;GO:0016020;GO:0006810;GO:0004889;GO:0004872	postsynaptic membrane;extracellular ligand-gated ion channel activity;neurotransmitter receptor activity;ion transport;ion channel activity;integral to membrane;membrane;transport;nicotinic acetylcholine-activated cation-selective channel activity;recepto	TRP	-0.792809
ENSANGT00000019399	AGAP000481-RA	LACTASE PHLORIZIN HYDROLASE PRECURSOR LACTASE GLYCOSYLCERAMIDASE [INCLUDES: LACTASE EC3.2.1.108 ; PHLORIZIN HYDROLASE EC3.2.1.- 62 ]	LACTASE PHLORIZIN HYDROLASE PRECURSOR LACTASE GLYCOSYLCERAMIDASE [INCLUDES: LACTASE EC3.2.1.108 , PHLORIZIN HYDROLASE EC3.2.1.- 62 ]	GO:0005975;GO:0004553	carbohydrate metabolism;hydrolase activity, hydrolyzing O-glycosyl compounds	M	0.846262
ENSANGT00000019433	AGAP000154-RA	LUCIFERIN 4 MONOOXYGENASE EC_1.13.12.7 LUCIFERASE	LUCIFERIN 4 MONOOXYGENASE EC1.13.12.7 LUCIFERASE	GO:0003824;GO:0008152	catalytic activity;metabolism	M	0.789003
ENSANGT00000019532	AGAP005303-RA	SERINE PROTEASE GD PRECURSOR EC3.4.21.- GASTRULATION DEFECTIVE	SERINE PROTEASE GD PRECURSOR EC3.4.21.- GASTRULATION DEFECTIVE	GO:0004252;GO:0006508	serine-type endopeptidase activity;proteolysis	PROT	-0.789345
ENSANGT00000019595	AGAP009048-RA	ARGININE N METHYLTRANSFERASE 5 EC2.1.1.- SHK1 KINASE BINDING 1 HOMOLOG JAK BINDING	ARGININE N METHYLTRANSFERASE 5 EC2.1.1.- SHK1 KINASE BINDING 1 HOMOLOG JAK BINDING	GO:0008757;GO:0005737;GO:0008168;GO:0005634;GO:0030528;GO:0040007;GO:0046698;GO:0035076	S-adenosylmethionine-dependent methyltransferase activity;cytoplasm;methyltransferase activity;nucleus;transcription regulator activity;growth;metamorphosis (sensu Insecta);ecdysone receptor-mediated signaling pathway	D	-0.707775
ENSANGT00000019689	AGAP008376-RA	39S RIBOSOMAL L28 MITOCHONDRIAL PRECURSOR L28MT MRP L28	39S RIBOSOMAL L28 MITOCHONDRIAL PRECURSOR L28MT MRP L28	GO:0005515;GO:0006412;GO:0003735;GO:0005762	protein binding;protein biosynthesis;structural constituent of ribosome;mitochondrial large ribosomal subunit	REDOX/STRESS/MIT	0.721477
ENSANGT00000019755		ZINC FINGER	ZINC FINGER	GO:0046872;GO:0003676;GO:0005634;GO:0008270	metal ion binding;nucleic acid binding;nucleus;zinc ion binding	D	-0.78944
ENSANGT00000019887		UNKNOWN	ATPGTPA,Hsp70	GO:0000166;GO:0005524;GO:0005515;GO:0007269;GO:0001700;GO:0007413;GO:0007399;GO:0009408;GO:0007411;GO:0016192;GO:0042026	nucleotide binding;ATP binding;protein binding;neurotransmitter secretion;embryonic development (sensu Insecta);axonal fasciculation;nervous system development;response to heat;axon guidance;vesicle-mediated transport;protein refolding	D	1.13634
ENSANGT00000020089		AMBIGUOUS	CDP-OHPtransf			D	-0.841508
ENSANGT00000020094	AGAP009527-RA	ENSANGT00000020094	ENSANGT00000020094			U	1.00352
ENSANGT00000020177	AGAP011827-RA	TRIFUNCTIONAL ENZYME BETA SUBUNIT MITOCHONDRIAL PRECURSOR TP BETA [INCLUDES: 3 KETOACYL COA THIOLASE EC2.3.1.16 ACETYL COA ACYLTRANSFERASE BETA KETOTHIOLASE ]	TRIFUNCTIONAL ENZYME BETA SUBUNIT MITOCHONDRIAL PRECURSOR TP BETA [INCLUDES: 3 KETOACYL COA THIOLASE EC2.3.1.16 ACETYL COA ACYLTRANSFERASE BETA KETOTHIOLASE ]			D	0.714432
ENSANGT00000020470	AGAP004094-RA	UNKNOWN				M	-0.727696
ENSANGT00000020647	AGAP006195-RA	ENSANGT00000020647	ENSANGT00000020647			U	0.897765
ENSANGT00000020935		TROPONIN I TNI				D	0.79026
ENSANGT00000020950	AGAP005323-RB	D AMINO ACID OXIDASE EC1.4.3.3 DAMOX DAO DAAO	D AMINO ACID OXIDASE EC1.4.3.3 DAMOX DAO DAAO	GO:0016491;GO:0006118	oxidoreductase activity;electron transport	TRP	-0.82159
ENSANGT00000021011	AGAP006398-RA	AMBIGUOUS	ENSANGT00000021011			U	1.01791
ENSANGT00000021208	AGAP001082-RA	UNKNOWN	CytChemebind,SapA,SapB1,SapB2,SaposinB,ZnfC2H2	GO:0005764;GO:0006629;GO:0006665	lysosome;lipid metabolism;sphingolipid metabolism	D	0.842255
ENSANGT00000021245	AGAP003696-RA	AMINOPEPTIDASE N EC3.4.11.2 MICROSOMAL AMINOPEPTIDASE	Peptidase M, neutral zinc metallopeptidases, zinc-binding site;Peptidase M1, membrane alanine aminopeptidase;Ribosomal protein L31	GO:0006508;GO:0004179	proteolysis;membrane alanyl aminopeptidase activity	PROT	1.21794
ENSANGT00000021345	AGAP000794-RA	NADH UBIQUINONE OXIDOREDUCTASE 49 KDA SUBUNIT MITOCHONDRIAL PRECURSOR	NADH UBIQUINONE OXIDOREDUCTASE 49 KDA SUBUNIT MITOCHONDRIAL PRECURSOR EC1.6.5.3 EC1.6.99.- 3 COMPLEX I 49KD CI 49KD	GO:0005489;GO:0006118;GO:0016651;GO:0005515	electron transporter activity;electron transport;oxidoreductase activity, acting on NADH or NADPH;protein binding	REDOX/STRESS/MIT	0.719625
ENSANGT00000021465	AGAP007050-RA	NUCLEOLAR GTP BINDING 1 CHRONIC RENAL FAILURE GENE GTP BINDING NGB	NUCLEOLAR GTP BINDING 1 CHRONIC RENAL FAILURE GENE GTP BINDING NGB	GO:0005525	GTP binding	D	-1.44013
ENSANGT00000021544	AGAP007711-RA	UNKNOWN	ENSANGT00000021544			U	0.76684
ENSANGT00000021546	AGAP007663-RA	HEMOLYMPH PRECURSOR	HEMOLYMPH PRECURSOR			I	1.0535
ENSANGT00000021793	AGAP006958-RA	HEAT SHOCK HSP	HEAT SHOCK HSP	GO:0000166;GO:0051082;GO:0006457;GO:0006986;GO:0005524	nucleotide binding;unfolded protein binding;protein folding;response to unfolded protein;ATP binding	REDOX/STRESS/MIT	0.687893
ENSANGT00000021949	AGAP000376-RA	TRANSFERRIN	TRANSFERRIN PRECURSOR	GO:0005576;GO:0008199;GO:0006879;GO:0006826	extracellular region;ferric iron binding;iron ion homeostasis;iron ion transport	I	0.954307
ENSANGT00000022037	AGAP002470-RA	MITOCHONDRIAL 60S RIBOSOMAL L27 L27MT	MITOCHONDRIAL 60S RIBOSOMAL L27 L27MT	GO:0005622;GO:0003735;GO:0006412;GO:0005840;GO:0005515	intracellular;structural constituent of ribosome;protein biosynthesis;ribosome;protein binding	REDOX/STRESS/MIT	-0.753318
ENSANGT00000022048	AGAP011166-RA	SERINE/THREONINE PHOSPHATASE	SERINE/THREONINE PHOSPHATASE EC3.1.3.16	GO:0005506;GO:0016787	iron ion binding;hydrolase activity	D	-1.0252
ENSANGT00000022164	AGAP002499-RA	ALDEHYDE DEHYDROGENASE	ALDEHYDE DEHYDROGENASE	GO:0004491;GO:0018478;GO:0006573;GO:0008152;GO:0016491;GO:0005739;GO:0005515	methylmalonate-semialdehyde dehydrogenase (acylating) activity;malonate-semialdehyde dehydrogenase (acetylating) activity;valine metabolism;metabolism;oxidoreductase activity;mitochondrion;protein binding	M	0.853531
ENSANGT00000022242	AGAP007747-RA	UNKNOWN	ENSANGT00000022242			U	0.845782
ENSANGT00000022258	AGAP004929-RA	ENSANGT00000022258	ENSANGT00000022258			U	0.700941
ENSANGT00000022279	AGAP011078-RA	ZINC FINGER MYND DOMAIN CONTAINING 10 BLU	ZINC FINGER MYND DOMAIN CONTAINING 10 BLU	GO:0008270;GO:0005515	zinc ion binding;protein binding	D	0.713674
ENSANGT00000022795	AGAP002350-RA	TROPONIN T	Tropomyosin	GO:0007498	mesoderm development	CS	-1.06185
ENSANGT00000022850	AGAP002564-RA	FRUCTOSE BISPHOSPHATE ALDOLASE EC4.1.2.13	FRUCTOSE BISPHOSPHATE ALDOLASE EC4.1.2.13	GO:0004332;GO:0006096;GO:0016829	fructose-bisphosphate aldolase activity;glycolysis;lyase activity	D	0.730123
ENSANGT00000023120		STOMATIN				U	-1.18308
ENSANGT00000023279	AGAP008023-RA	HOMEOBOX EN	HOMEOBOX EN	GO:0043565;GO:0045449;GO:0007275;GO:0007367;GO:0005634;GO:0003677;GO:0003700;GO:0006355	sequence-specific DNA binding;regulation of transcription;development;segment polarity determination;nucleus;DNA binding;transcription factor activity;regulation of transcription, DNA-dependent	RTT	0.700688
ENSANGT00000023547	AGAP009564-RA	ENSANGT00000023547	ENSANGT00000023547	GO:0016469;GO:0046933;GO:0046961;GO:0015986;GO:0005739	proton-transporting two-sector ATPase complex;hydrogen-transporting ATP synthase activity, rotational mechanism;hydrogen-transporting ATPase activity, rotational mechanism;ATP synthesis coupled proton transport;mitochondrion	REDOX/STRESS/MIT	0.862429
ENSANGT00000023570		TROPONIN I TNI	TROPONIN I TNI			D	0.735576
ENSANGT00000023588	AGAP001053-RA	TROPONIN I TNI	Troponin	GO:0005515;GO:0007517;GO:0007399;GO:0030239;GO:0005861;GO:0045214	protein binding;muscle development;nervous system development;myofibril assembly;troponin complex;sarcomere organization	D	0.806722
ENSANGT00000023707		SERINE/THREONINE PHOSPHATASE EC3.1.3.16	SERINE/THREONINE PHOSPHATASE EC3.1.3.16			D	0.783478
ENSANGT00000023796		UNKNOWN				U	0.700988
ENSANGT00000023853		TROPONIN I TNI	TROPONIN I TNI			D	0.928419
ENSANGT00000024098	AGAP005972-RB	UNKNOWN	Haloacid dehalogenase-like hydrolase	GO:0003824;GO:0008152;GO:0016787	catalytic activity;metabolism;hydrolase activity	M	-0.727756
ENSANGT00000024108	AGAP003248-RA	SERINE PROTEASE	SERINE PROTEASE	GO:0004252;GO:0006508	serine-type endopeptidase activity;proteolysis	PROT	0.710279
ENSANGT00000024206	AGAP006254-RB AGAP006254-RC AGAP006254-RA	UDP N ACETYLGLUCOSAMINE PEPTIDE N ACETYLGLUCOSAMINYLTRANSFERASE 110 KDA SUBUNIT EC2.4.1.- O GLCNAC TRANSFERASE P110 SUBUNIT	UDP N ACETYLGLUCOSAMINE PEPTIDE N ACETYLGLUCOSAMINYLTRANSFERASE 110 KDA SUBUNIT EC2.4.1.- O GLCNAC TRANSFERASE P110 SUBUNIT	GO:0005488	binding	D	0.978124
ENSANGT00000024226		MYOSIN HEAVY CHAIN				U	0.697719
ENSANGT00000024237		MYOSIN HEAVY CHAIN	MYOSIN HEAVY CHAIN			CS	0.748243
ENSANGT00000024378	AGAP003372-RA	GS1	GS1	GO:0003824;GO:0008152	catalytic activity;metabolism	M	-0.859954
ENSANGT00000025011	AGAP012508-RA	ENSANGT00000025011	ENSANGT00000025011			U	-0.850661
ENSANGT00000025070	AGAP007347-RA	LYSOZYME C EC3.2.1.17 1 4 BETA N ACETYLMURAMIDASE C	LYSOZYME C EC3.2.1.17 1 4 BETA N ACETYLMURAMIDASE C	GO:0003796;GO:0016998;GO:0005576;GO:0042742;GO:0003824;GO:0005975;GO:0016798;GO:0016787;GO:0019835	lysozyme activity;cell wall catabolism;extracellular region;defense response to bacteria;catalytic activity;carbohydrate metabolism;hydrolase activity, acting on glycosyl bonds;hydrolase activity;cytolysis	I	0.796348
ENSANGT00000025148		TROPOMYOSIN				D	-0.743507
ENSANGT00000025421		ENSANGT00000025421	ENSANGT00000025421			U	-0.800299
ENSANGT00000025439	AGAP005203-RE	PGRP	PEPTIDOGLYCAN RECOGNITION,Amidase2	GO:0005515;GO:0008745;GO:0009253	protein binding;N-acetylmuramoyl-L-alanine amidase activity;peptidoglycan catabolism	I	1.3027
ENSANGT00000025804		AMBIGUOUS	ENSANGT00000025804			U	0.923077
ENSANGT00000025824	AGAP003711-RA	VACUOLAR PROTON TRANSLOCATING ATPASE 116 KDA SUBUNIT A V ATPASE 116 KDA PROTON PUMP 116 KDA SUBUNIT 1	VACUOLAR PROTON TRANSLOCATING ATPASE 116 KDA SUBUNIT A V ATPASE 116 KDA PROTON PUMP 116 KDA SUBUNIT 1	GO:0015992;GO:0016020	proton transport;membrane	TRP	0.701161
ENSANGT00000025897	AGAP008329-RA	40S RIBOSOMAL S5	40S RIBOSOMAL S5	GO:0005622;GO:0003735;GO:0030529;GO:0015935;GO:0006412;GO:0005840	intracellular;structural constituent of ribosome;ribonucleoprotein complex;small ribosomal subunit;protein biosynthesis;ribosome	RTT	0.725147
ENSANGT00000025929		ENSANGT00000025929	MYOSIN			CS	0.931966
ENSANGT00000026354	AGAP008517-RA	UNKNOWN	ENSANGT00000026354			U	-0.734174
ENSANGT00000026373		FETAL ALZHEIMER ANTIGEN FETAL ALZ 50 REACTIVE 1	FETAL ALZHEIMER ANTIGEN FETAL ALZ 50 REACTIVE 1			M	-0.907048
ENSANGT00000026448		UNKNOWN	ENSANGT00000026448			U	-0.903381
ENSANGT00000026476	AGAP001940-RA	UNKNOWN	ENSANGT00000026476	GO:0005515	protein binding	U	-0.755933
ENSANGT00000026889	AGAP009883-RA	GROWTH HORMONE INDUCIBLE TRANSMEMBRANE DERMAL PAPILLA DERIVED 2 MY021 PTD010 UNQ244/PRO281				D	1.01957
ENSANGT00000026971		UNKNOWN	ENSANGT00000026971			U	-0.747412
ENSANGT00000027061	AGAP012659-RA	ODORANT BINDING OBPJJ4 PRECURSOR		GO:0005549;GO:0006810	odorant binding;transport	CSR	-1.01313
ENSANGT00000027135	AGAP007508-RA	UNKNOWN	ENSANGT00000027135	GO:0000941	inner kinetochore of condensed nuclear chromosome	D	0.923756
ENSANGT00000027284		ENSANGT00000027284	ENSANGT00000027284			U	0.798129
ENSANGT00000027422		UNKNOWN	ENSANGT00000027422			U	1.96414
ENSANGT00000027635		ENSANGT00000027635	ENSANGT00000027635			U	-0.978507
ENSANGT00000027917		EUKARYOTIC TRANSLATION INITIATION FACTOR 5A EIF 5A	EUKARYOTIC TRANSLATION INITIATION FACTOR 5A EIF 5A			RTT	-0.799578
ENSANGT00000028180		UNKNOWN	ENSANGT00000028180	GO:0008270	zinc ion binding	U	-0.729211
ENSANGT00000028499		UNKNOWN	ENSANGT00000028499			U	-0.830597
ENSANGT00000028597	AGAP007333-RA	UNKNOWN	ENSANGT00000028597			U	-0.888651
ENSANGT00000028911		26S PROTEASOME NON ATPASE REGULATORY SUBUNIT	26S PROTEASOME NON ATPASE REGULATORY SUBUNIT 1 26S PROTEASOME REGULATORY SUBUNIT S1 26S PROTEASOME SUBUNIT P112			D	-1.1949
ENSANGT00000029006	AGAP005524-RC	CALCIUM AND INTEGRIN BINDING 1	CALCIUM AND INTEGRIN BINDING 1 CALMYRIN DNA PKCS INTERACTING KINASE INTERACTING KIP CIB	GO:0005509	calcium ion binding	D	0.899182
ENSANGT00000029080		40S RIBOSOMAL S27A				D	0.900405
ENSANGT00000029111	AGAP000647-RA	AMBIGUOUS	ENSANGT00000029111	GO:0005576;GO:0008061;GO:0006030	extracellular region;chitin binding;chitin metabolism	D	1.86908
ENSANGT00000029467		ENSANGT00000029467				U	2.44648
ENSANGT00000029587	AGAP004463-RA	AMBIGUOUS	NLSBP	GO:0005515	protein binding	U	0.973754
ENSANGT00000029709		MULTIFUNCTIONAL ADE2	MULTIFUNCTIONAL ADE2 [INCLUDES: PHOSPHORIBOSYLAMINOIMIDAZOLE SUCCINOCARBOXAMIDE SYNTHASE EC6.3.2.6 SAICAR SYNTHETASE , PHOSPHORIBOSYLAMINOIMIDAZOLE CARBOXYLASE EC4.1.1.- 21 AIR CARBOXYLASE AIRC ]			D	0.933721
ENSANGT00000029710		ENSANGT00000029710	ENSANGT00000029710			U	0.776704
